# Supplementary material for: Mechanical Performance of Rat, Mouse and Mole Spring Traps, and Possible Implications for Welfare Performance
Source: PLOS journal article supplement (doi:10.1371/journal.pone.0039334), 2012-06-29
Supplement: S7 (10.1371/journal.pone.0039334.s007) [file journal.pone.0039334.s007]

|                            |           |                                                         |
|----------------------------|-----------|---------------------------------------------------------|
| <b>A) Rat trap types</b>   | <b>1</b>  | Big Cheese Quick Click Rat Trap                         |
|                            | <b>2</b>  | Big Cheese Pro-Strength Pre-Baited Rat Trap             |
|                            | <b>3</b>  | Bayer Garden (Victor) Professional Rat Trap             |
|                            | <b>4</b>  | CAT Safe & Sure Rat Trap                                |
|                            | <b>5</b>  | Fito Heavy Duty Prebaited Easy Set Plastic Rat Trap     |
|                            | <b>6</b>  | Fito Wooden Rat Trap                                    |
|                            | <b>7</b>  | Procter Pest-Stop Easy Setting Metal Rat Trap           |
|                            | <b>8</b>  | Pest Police Rat-Trap                                    |
|                            | <b>9</b>  | Procter Little Nipper                                   |
|                            | <b>10</b> | Rentokil Advanced Rat Trap                              |
|                            | <b>11</b> | Rolson Rat Trap                                         |
|                            | <b>12</b> | Snap-E Rat Trap                                         |
|                            | <b>13</b> | Self-set Metal Rat Trap                                 |
|                            | <b>14</b> | Tom Cat Rat Snap Trap                                   |
|                            | <b>15</b> | Trapper T-Rex Rat Snap Trap                             |
|                            | <b>16</b> | Yeoman Speed-Set Rat Trap                               |
|                            | <b>17</b> | Yeoman Traditional Rat Trap                             |
|                            | <b>18</b> | Zero-In Metal Rat Trap                                  |
| <b>B) Mouse trap types</b> | <b>1</b>  | Big Cheese Quick Click Prebaited Mouse Trap             |
|                            | <b>2</b>  | Big Cheese Pro-Strength (Easy To Set) Mouse Trap        |
|                            | <b>3</b>  | Bayer Garden (Victor) Advanced Mouse Trap               |
|                            | <b>4</b>  | Fito Pre-Baited Easy-Set Mouse Trap                     |
|                            | <b>5</b>  | Home Defence Press N Set Mouse Trap                     |
|                            | <b>6</b>  | Jak Mouse Trap                                          |
|                            | <b>7</b>  | Procter Pest-Stop Advanced (Quick Kill) Mouse Trap      |
|                            | <b>8</b>  | Procter Pest-Stop Easy Setting Metal Mouse Trap         |
|                            | <b>9</b>  | Pest Police Mouse-Trap                                  |
|                            | <b>10</b> | Procter Pest-Stop Pre-Baited (Plastic) Snap Trap        |
|                            | <b>11</b> | Procter Pest-Stop Sure-Set Mouse Trap                   |
|                            | <b>12</b> | Procter Little Nipper                                   |
|                            | <b>13</b> | Raco Mouse Killer Snap Trap                             |
|                            | <b>14</b> | Raco Wooden Mighty Mouse Trap                           |
|                            | <b>15</b> | Rentokil Advanced Mouse Trap                            |
|                            | <b>16</b> | Rentokil Quick-Set Mouse Trap                           |
|                            | <b>17</b> | Rentokil (Wooden) Mouse Trap                            |
|                            | <b>18</b> | Snap-E Mouse Trap                                       |
|                            | <b>19</b> | Tom Cat Mouse Snap Trap                                 |
|                            | <b>20</b> | Tool-Tech Wooden Mouse Trap                             |
|                            | <b>21</b> | Trapper T-Rex (Mini Rex) Extra Strength Mouse Snap Trap |
|                            | <b>22</b> | 'UK Brand' Mouse Snappa                                 |
|                            | <b>23</b> | Zero-In Metal Mouse Trap                                |
